# Supplementary material
Source: PubMed Central journal article supplement (PMC6648102)
Supplement: ao9b00992_si_001.pdf [file ao9b00992_si_001.pdf]

## Supporting information for:

# The C-terminal Plays as the Possible Nucleation of the Self-Aggregation of S-shape A $\beta$ <sub>11-42</sub> Tetramer in Solution: Intensive MD Study

Nguyen Thanh Tung<sup>a</sup> Philippe Derreumaux,<sup>bcd</sup> Van V. Vu,<sup>e</sup> Pham Cam Nam,<sup>f</sup> Son Tung Ngo,<sup>gh\*</sup>

<sup>a</sup>Institute of Materials Science, Vietnam Academy of Science and Technology, Hanoi, Vietnam;

<sup>b</sup>Laboratory of Theoretical and Chemistry, Ton Duc Thang University, Ho Chi Minh City, Vietnam;

<sup>c</sup>Faculty of Pharmacy, Ton Duc Thang University, Ho Chi Minh City, Vietnam;

<sup>d</sup>Laboratoire de Biochimie Theorique, UPR 9080 CNRS, IBPC, Universite Paris 7, 13 rue Pierre et Marie Curie, 75005, Paris, France;

<sup>e</sup>NTT Hi-Tech Institute, Nguyen Tat Thanh University, Ho Chi Minh City, Vietnam;

<sup>f</sup>Department of Chemical Engineering, The University of Da Nang - University of Science and Technology, Da Nang City, Vietnam;

<sup>g</sup>Laboratory of Theoretical and Computational Biophysics, Ton Duc Thang University, Ho Chi Minh City, Vietnam;

<sup>h</sup>Faculty of Applied Sciences, Ton Duc Thang University, Ho Chi Minh City, Vietnam

\*Emails: [ngosontung@tdtu.edu.vn](mailto:ngosontung@tdtu.edu.vn)

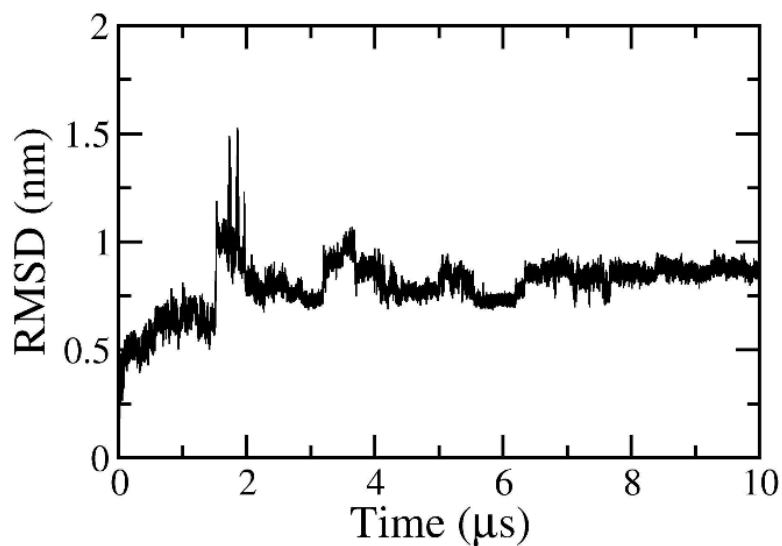

**Figure S1.** Backbone RMSD of S4A $\beta_{11-42}$  peptide in time evolution.

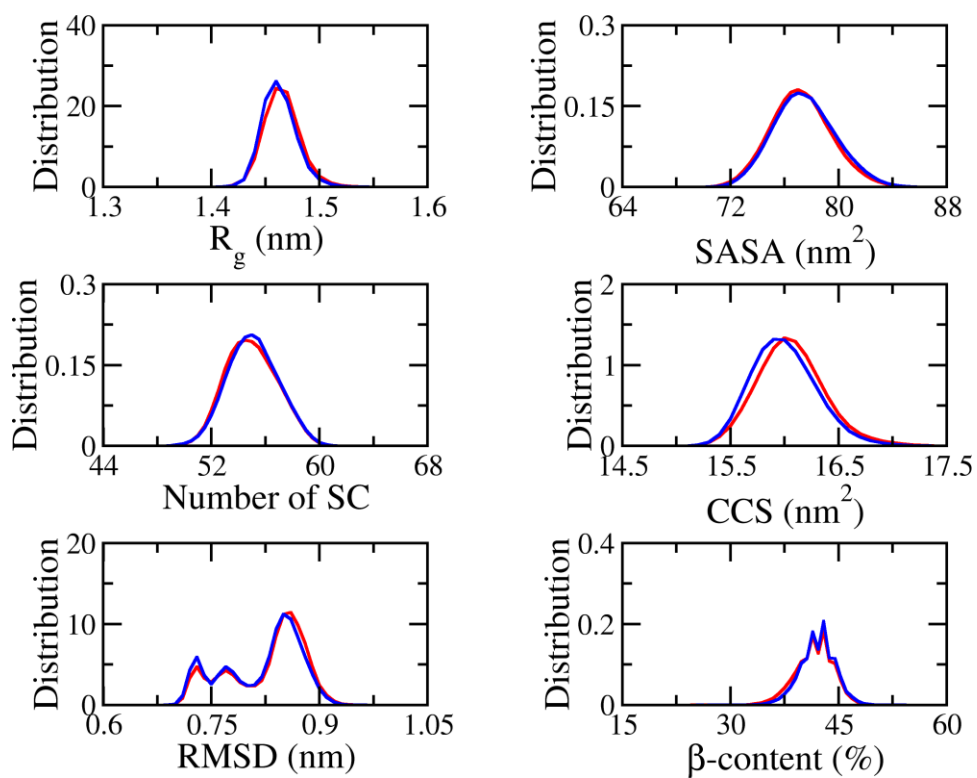

**Figure S2.** The calculated metrics over different simulation time intervals including 4-10  $\mu$ s (red color) and 5.2-8.8  $\mu$ s (blue color). The convergence of simulations was validated according to the superposition of these curves mentioned.

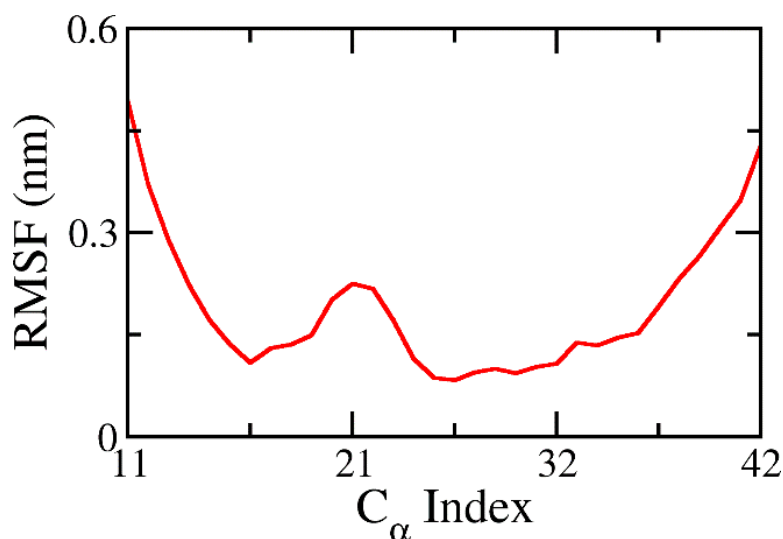

**Figure S3.** The root mean square fluctuation (RMSF) of C<sub>α</sub> atoms during the last 6 μs of MD simulations. Measured results were obtained every 10 ps using GROMACS tools.<sup>1</sup>

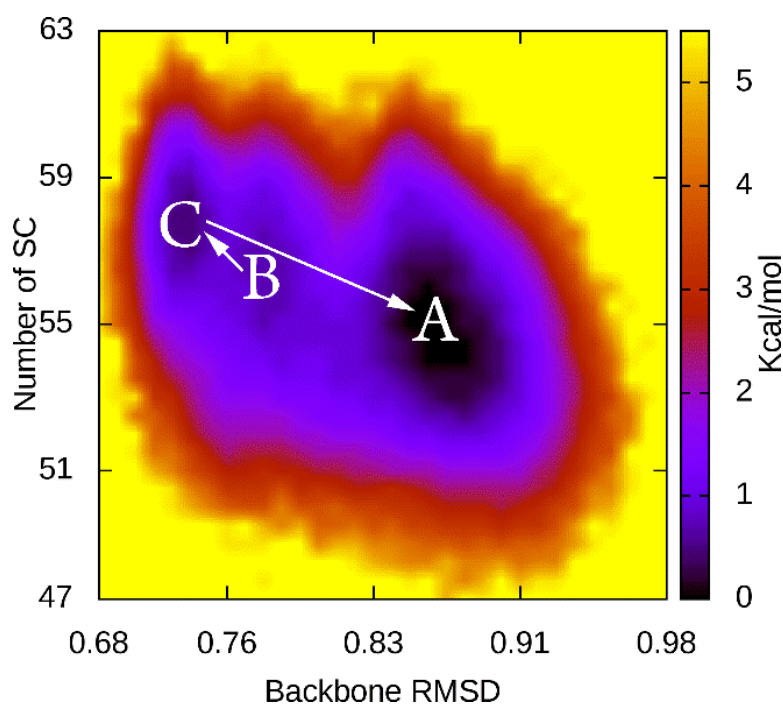

**Figure S4.** The collective-variable free energy landscape of S4Aβ<sub>11-42</sub> peptide over the last 6 μs of MD simulations. The backbone RMSD and number of non-bonded contacts between constituting chains of the peptide are used as the reaction coordinates. The white arrow mentioned the probable self-aggregation pathway of the tetramer.

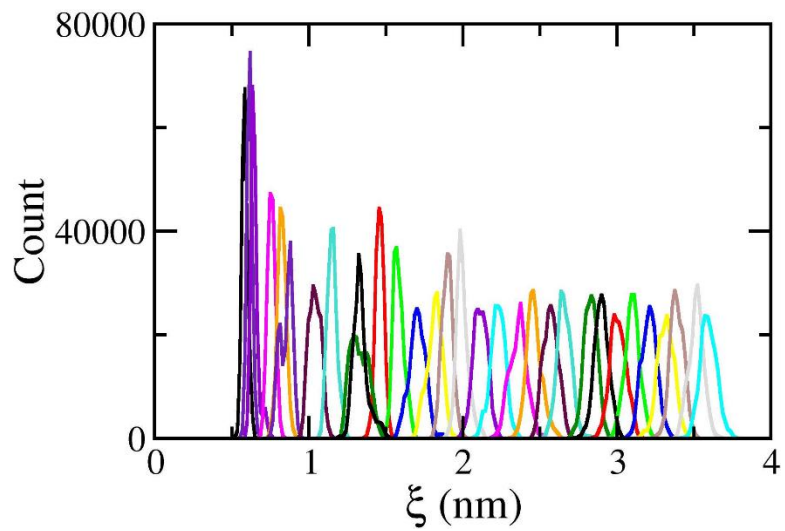

**Figure S5.** The histograms of 31 different windows of the umbrella sampling simulations.

## References

1. Abraham, M. J.; Murtola, T.; Schulz, R.; Páll, S.; Smith, J. C.; Hess, B.; Lindahl, E., GROMACS: High Performance Molecular Simulations through Multi-Level Parallelism from Laptops to Supercomputers. *SoftwareX* **2015**, *1–2*, 19-25.
